# Supplementary material for: Candidatus Frankia Datiscae Dg1, the Actinobacterial Microsymbiont of Datisca glomerata, Expresses the Canonical nod Genes nodABC in Symbiosis with Its Host Plant
Source: PubMed Central journal article supplement (PMC4447401; doi:10.1371/journal.pone.0127630), 2015-05-28

**S6 Fig. Maximum Likelihood trees of (A) NodI and (B) NodJ proteins.** All sequences from Dg1 are given in red. Sequences from  $\beta$ -proteobacteria where the rhizobial *nodIJ* genes evolved are given in green, sequences from  $\alpha$ -proteobacteria are given in turquoise. Names of actinobacterial NltI/NltJ sequences the genes of which are part of a *nodBCnltIJ* operon are indicated in blue. The sequences from *Streptomyces bottropensis* are given in purple. All sequences used for the phylogenetic analysis are given in S6 Table.

(A) NodI

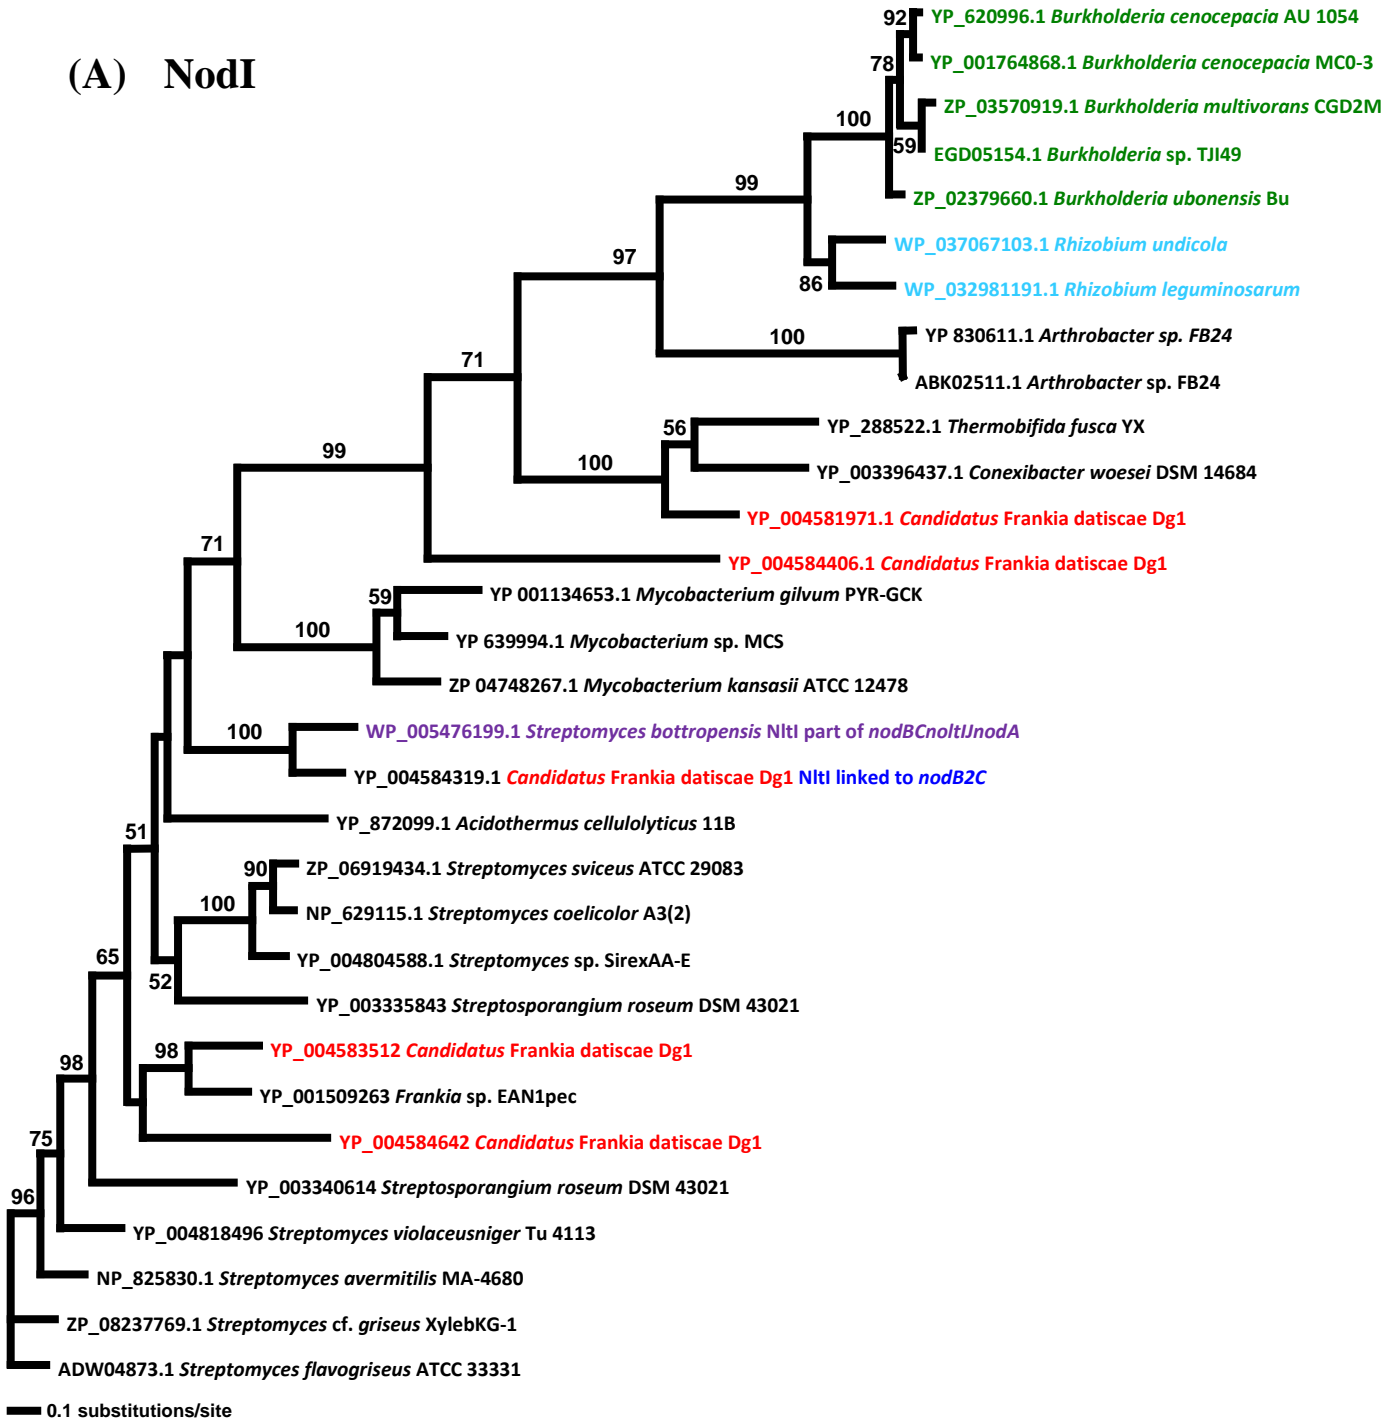

(B) NodJ

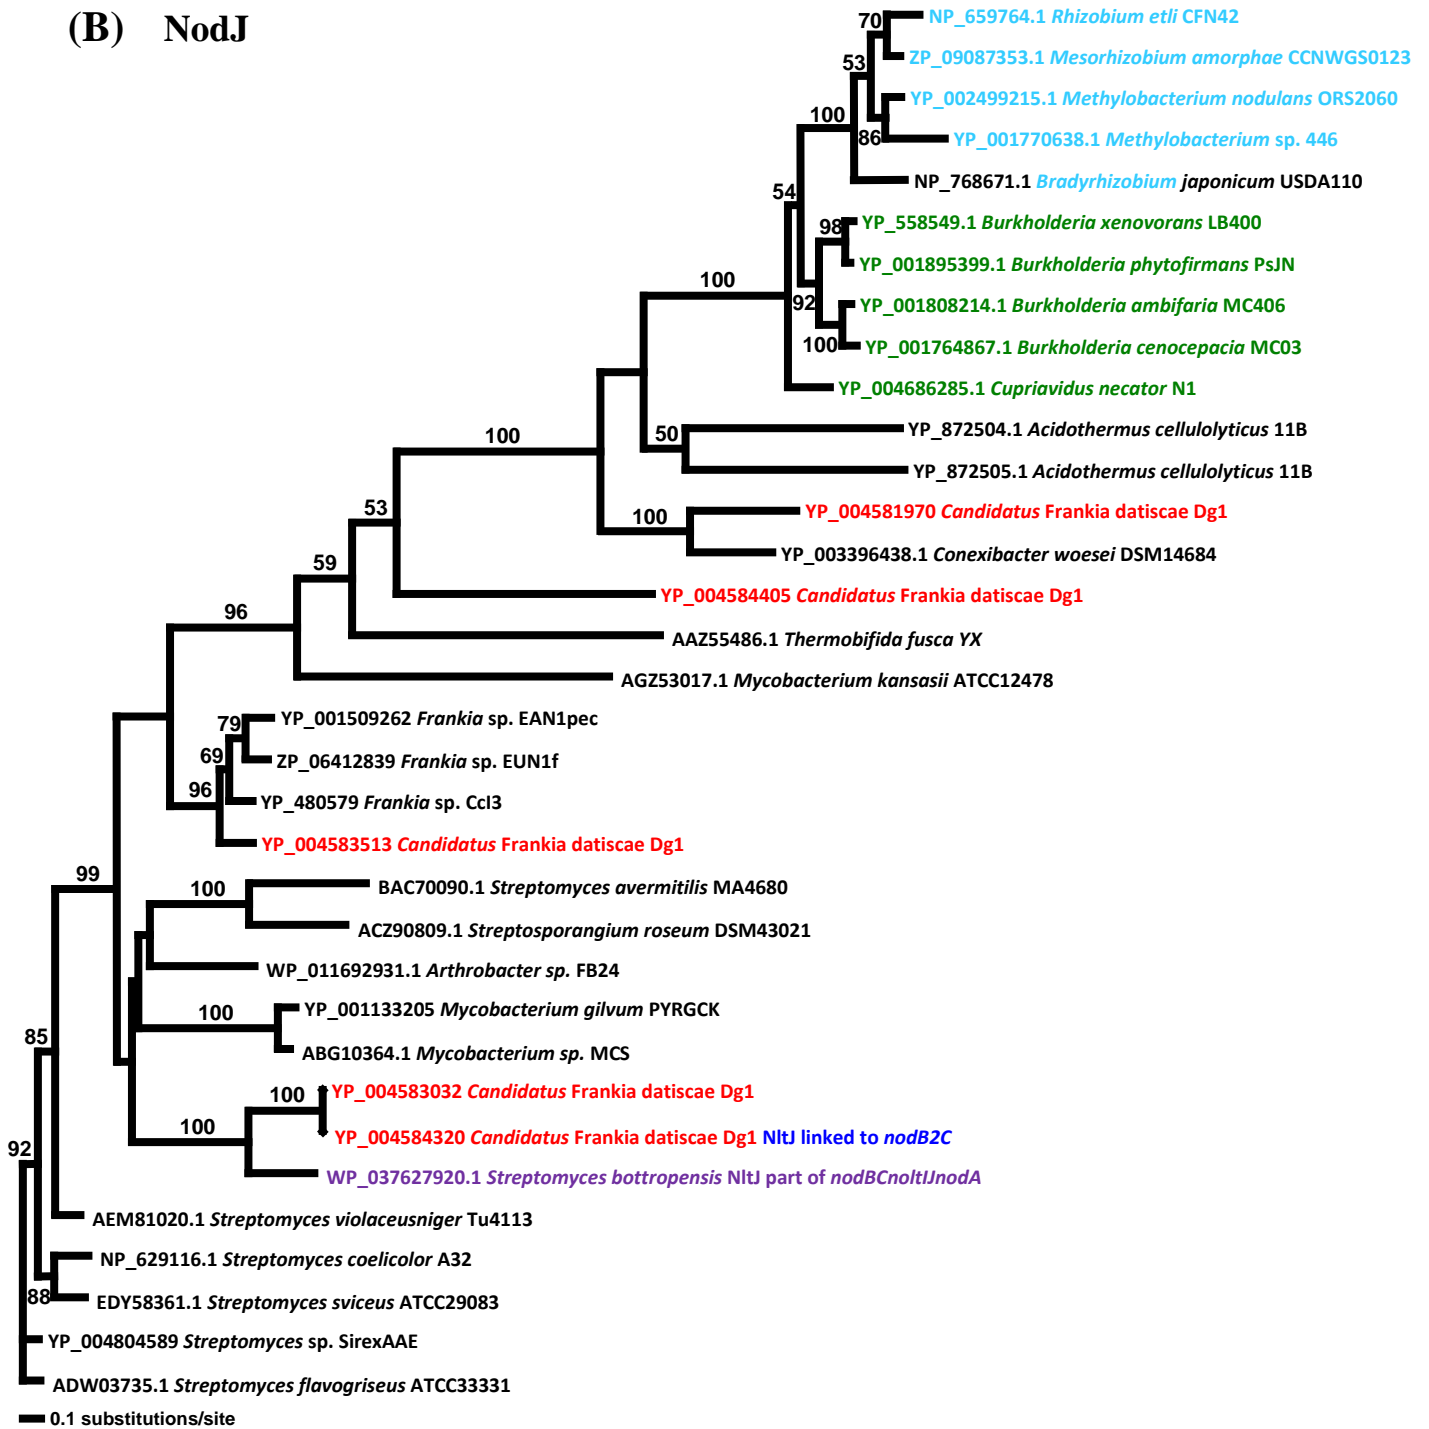

Supplement: pone.0127630.s006.pdf [file pone.0127630.s006.pdf]
